1  
2  
3  
4  
5  
6  
7  
8  
9  
10  
11  
12  
13  
14  
15  
16  
17  
18  
19  
20  
21  
22

# Whole exome sequencing of ENU-induced thrombosis modifier mutations in the mouse

Short title:

Identifying thrombosis modifier genes

Kärt Tomberg<sup>1,#a</sup>, Randal J. Westrick<sup>2</sup>, Emilee N. Kotnik<sup>3,#b</sup>, David R Siemieniak<sup>3,4</sup>,  
Guojing Zhu<sup>3</sup>, Thomas L. Saunders<sup>5,6</sup>, Audrey C. Cleuren<sup>3</sup>, and David Ginsburg<sup>1,3,4,5,7,\*</sup>

<sup>1</sup>Department of Human Genetics, University of Michigan, Ann Arbor, Michigan, United States of America

<sup>2</sup>Department of Biological Sciences and Center for Data Science and Big Data Analysis, Oakland University, Rochester, Michigan, United States of America

<sup>3</sup>Life Sciences Institute, University of Michigan, Ann Arbor, Michigan, United States of America

<sup>4</sup>Howard Hughes Medical Institute, University of Michigan, Ann Arbor, Michigan, United States of America

<sup>5</sup>Departments of Internal Medicine, Division of Molecular Medicine and Genetics, University of Michigan, Ann Arbor, Michigan, United States of America

<sup>6</sup>Transgenic Animal Model Core Laboratory, University of Michigan, Ann Arbor, Michigan, United States of America

23 <sup>7</sup>Departments of Pediatrics, University of Michigan, Ann Arbor, Michigan, United States  
24 of America

25 <sup>#a</sup>Current Address: Wellcome Sanger Institute, Hinxton, Cambridgeshire, United  
26 Kingdom

27 <sup>#b</sup>Current Address: Department of Molecular Genetics and Genomics, Washington  
28 University in St. Louis, Missouri, United States of America

29

30 \* Corresponding author

31 Email: ginsburg@umich.edu (DG)

32

### 33 **Abstract**

34 Although the Factor V Leiden (FVL) gene variant is the most prevalent genetic  
35 risk factor for venous thrombosis, only 10% of FVL carriers will experience such an  
36 event in their lifetime. To identify potential FVL modifier genes contributing to this  
37 incomplete penetrance, we took advantage of a perinatal synthetic lethal thrombosis  
38 phenotype in mice homozygous for FVL ( $F5^{L/L}$ ) and haploinsufficient for tissue factor  
39 pathway inhibitor ( $Tfpi^{+/-}$ ) to perform a sensitized dominant ENU mutagenesis screen.  
40 Linkage analysis conducted in the 3 largest pedigrees generated from the surviving  
41  $F5^{L/L} Tfpi^{+/-}$  mice ('rescues') using ENU-induced coding variants as genetic markers was  
42 unsuccessful in identifying major suppressor loci. Whole exome sequencing was  
43 applied to DNA from 107 rescue mice to identify candidate genes enriched for ENU  
44 mutations. A total of 3,481 potentially deleterious candidate ENU variants were  
45 identified in 2,984 genes. After correcting for gene size and multiple testing, *Arl6ip5* was

46 identified as the most enriched gene, though not reaching genome-wide significance.  
47 Evaluation of CRISPR/Cas9 induced loss of function in the top 6 genes failed to  
48 demonstrate a clear rescue phenotype. However, a maternally inherited (not ENU-  
49 induced) *de novo* mutation (*Plcb4*<sup>R335Q</sup>) exhibited significant co-segregation with the  
50 rescue phenotype ( $p=0.003$ ) in the corresponding pedigree. Thrombosis suppression by  
51 heterozygous *Plcb4* loss of function was confirmed through analysis of an independent,  
52 CRISPR/Cas9-induced *Plcb4* mutation ( $p=0.01$ ).

53

## 54 **Author summary**

55 Abnormal blood clotting in veins (venous thrombosis) or arteries (arterial  
56 thrombosis) are major health problems, with venous thrombosis affecting approximately  
57 1 in every thousand individuals annually in the United States. Susceptibility to venous  
58 thrombosis is governed by both genes and environment, with approximately 60% of the  
59 risk attributed to genetic influences. Though several genetic risk factors are known,  
60 >50% of genetic risk remains unexplained. Approximately 5% of people carry the most  
61 common known risk factor, Factor V Leiden. However, only 10% of these individuals will  
62 develop a blood clot in their lifetime. Mice carrying two copies of the Factor V Leiden  
63 mutation together with a mutation in a second gene called tissue factor pathway  
64 inhibitor develop fatal thrombosis shortly after birth. To identify genes that prevent this  
65 fatal thrombosis, we studied a large panel of mice carrying inactivating gene changes  
66 randomly distributed throughout the genome. We identified several genes as potential  
67 candidates to alter blood clotting balance in mice and humans with predisposition to

68 thrombosis, and confirmed this protective function for DNA changes in one of these  
69 genes (*Plcb4*).

70

## 71 **Introduction**

72 Venous thromboembolism (VTE) affects 1:1000 individuals in the US each year  
73 and is highly heritable [1, 2]. A single nucleotide variant (SNV) in the *F5* gene, referred  
74 to as Factor V Leiden (FVL, p.R506G) is present in 5-10% of Europeans, conferring a 2-  
75 4 fold increased risk for VTE [3]. Although ~25% of VTE patients carry the FVL variant  
76 [4], only ~10% of individuals heterozygous for FVL develop thrombosis in their lifetime.

77 To identify genetic variants that could potentially function as modifiers for FVL-  
78 associated VTE risk, we recently reported a dominant ENU screen [5] in mice sensitized  
79 for thrombosis. Mice homozygous for the FVL mutation (*F5<sup>L/L</sup>*) and haploinsufficient for  
80 tissue factor pathway inhibitor (*Tfpi<sup>+/-</sup>*) die of perinatal thrombosis [6]. After ENU  
81 mutagenesis, 98 G1 *F5<sup>L/L</sup> Tfpi<sup>+/-</sup>* progeny survived to weaning (“rescues”) and 16  
82 progeny exhibited successful transmission of the ENU-induced suppressor mutation.  
83 However, subsequent efforts to genetically map the corresponding suppressor loci were  
84 confounded by complex strain-specific differences introduced by the required genetic  
85 outcross [5]. Similar genetic background effects have complicated previous mapping  
86 efforts [7] and have been noted to significantly alter other phenotypes [8, 9]. Additional  
87 challenges of this mapping approach include the requirement for large pedigrees and  
88 limited mapping resolution, with candidate intervals typically harboring tens to hundreds  
89 of genes and multiple closely linked mutations.

90 High throughput sequencing methods have enabled the direct identification of  
91 ENU-induced mutations. Thus, mutation identification in ENU screens is no longer  
92 dependent upon an outcross strategy for gene mapping [10, 11]. We now report whole  
93 exome sequencing (WES) of 107 rescue mice (including 50 mice from the previously  
94 reported ENU screen [5]). Assuming loss of gene function as the mechanism of rescue,  
95 these WES data were analyzed gene-by-gene to identify genes enriched with mutations  
96 (mutation burden analysis). The *Arl6ip5* gene emerged as the top candidate suppressor  
97 locus from this analysis. However, an independent CRISPR/Cas9-generated *Arl5ip5*  
98 mutant allele failed to demonstrate highly penetrant rescue of the  $F5^{L/L} Tfp1^{+/-}$  lethal  
99 phenotype. Surprisingly, a maternally inherited (not ENU-induced) *de novo* mutation  
100 (*Plcb4*<sup>R335Q</sup>) exhibited significant co-segregation with the rescue phenotype (p=0.003) in  
101 an expanded pedigree.

102

## 103 **Results and discussion**

### 104 **Smaller rescue pedigrees on pure C57BL/6J background**

105 In the previously reported ENU screen [5], viable  $F5^{L/L} Tfp1^{+/-}$  rescue mice were  
106 outcrossed to the 129S1/SvImJ strain to introduce the genetic diversity required for  
107 subsequent mapping experiments. However, complex strain modifier gene interactions  
108 confounded this analysis and resulted in a large number of “phenocopies” (defined as  
109 viable  $F5^{L/L} Tfp1^{+/-}$  mice lacking the original rescue mutation). To eliminate confounding  
110 effects of these thrombosis strain modifiers, we generated an additional 2,834 G1  
111 offspring exclusively maintained on the C57BL/6J background. Fifteen new rescue  
112 pedigrees were established from this screen (S1 Table). The frequency, survival,

113 weight, and sex distributions of identified rescues were consistent with our previous  
114 report (S1 Fig). Though many of the pedigrees previously generated on the mixed  
115 129S1/SvImJ-C57BL/6J background generated >45 rescue progeny per pedigree (8/16)  
116 [5], all pedigrees on the pure C57BL/6J background yielded <36 rescue mice (most  
117 generating  $\leq 5$  rescues) (S1 Table). Significantly smaller pedigrees in comparison to the  
118 previous screen ( $p=0.010$ , S2 Fig) are likely explained by a generally positive effect of  
119 the hybrid 129S1/SvImJ-C57BL/6J strain background either directly on rescue fertility  
120 (hybrid vigor) or indirectly by reducing the severity of the  $F5^{L/L}$  phenotype. The  
121 C57BL/6J and 129S1/SvImJ strains have been shown to exhibit significant differences  
122 in a number of hemostasis-related parameters, including platelet count and TFPI and  
123 tissue factor expression levels [12], with the genetic variations underlying such strain  
124 specific differences likely contributing to the genetic mapping complexity noted in the  
125 previous report [5].

126

### 127 **Linkage analysis using coding ENU variants fails to map suppressor loci**

128 As the rescue pedigrees were maintained on a pure C57BL/6J background, the  
129 only genetic markers that could be used for mapping were ENU-induced variants. WES  
130 of one G1 or G2 member of the three largest pedigrees (1, 6, and 13, S2 Table),  
131 identified a total of 86 candidate ENU variants that were also validated by Sanger  
132 sequencing analysis (S3 Table). Of these 86 candidate genes, 69 were present in the  
133 G1 rescue but not its parents (G0), indicating that they were likely ENU-induced  
134 variants. These 69 variants were then further genotyped in all other rescue progeny in  
135 the respective pedigrees. Given the low number of identified genetic markers (20-26 per

136 pedigree), these three pedigrees were poorly powered (29.6%, 21.7% and 39.4%,  
137 respectively) to identify the rescue variants by linkage analysis (S3-S5 Figs A). None of  
138 the 19 ENU variants tested in pedigree 1 (S3 Fig B), showed linkage with a LOD-score  
139 >1.5 (S3 Fig C). Similarly, 26 and 24 variants analyzed in pedigrees 6 and 13,  
140 respectively (S4, S5 Figs B) also failed to demonstrate a LOD-score >1.5 (S4, S5 Figs  
141 C). Failure to map the causal loci in any of these pedigrees was likely due to insufficient  
142 marker coverage. However, in these analyses, we could not exclude the contribution  
143 from a non-ENU-induced variant [13] or an unexpectedly high phenocopy rate. While  
144 WES has been successfully applied to identify causal ENU variants within inbred lines  
145 [14] and in mixed background lines [15, 16], whole genome sequencing (WGS) provides  
146 much denser and more even coverage of the entire genome (~3,000 ENU  
147 variants/genome expected) and outperforms WES for mapping [11]. However, a WGS  
148 approach requires sequencing multiple pedigree members [10], or pooled samples at  
149 high coverage [11], resulting in considerably higher expense with current methods.

150

### 151 **WES identifies 6,771 ENU-induced variants in 107 rescues**

152 In order to identify exonic ENU mutations, a total of 107 G1 rescues (57 from the  
153 current ENU screen and an additional 50 rescues with available material from the  
154 previous screen [5]), were subjected to WES (S2 Table). From ~1.5 million initially  
155 called variants, 6,735 SNVs and 36 insertions-deletions (INDELs) within exonic regions  
156 were identified as potential ENU-induced mutations, using an in-house filtering pipeline  
157 (see Materials and methods). The most common exonic variants were nonsynonymous  
158 SNVs (47%), followed by mutations in 3' and 5' untranslated regions (31%) and

159 synonymous SNVs (15%). The remaining variants (7%) were classified as splice site  
160 altering, stoploss, stopgain, or INDELS (Fig 1A). T/A -> C/G (47%), and T/A -> A/T  
161 (24%) SNVs were overrepresented, while C/G -> G/C (0.8%) changes were greatly  
162 underrepresented (Fig 1B), consistent with previously reported ENU studies [17, 18].  
163 Since ENU is administered to the G0 father of G1 rescues, only female progeny are  
164 expected to carry induced mutations on the X chromosome, while males inherit their  
165 single X chromosome from the unmutagenized mother. Among the called variants, all  
166 chromosomes harbored a similar number of mutations in both sexes, with the exception  
167 of the X chromosome where a >35 fold increase in SNVs per mouse was observed in  
168 females (Fig 1C). The average number of exonic ENU mutations for G1 rescues was  
169 ~65 SNV per mouse (Fig 1D), consistent with expected ENU mutation rates [10, 18].  
170 These data suggest that most called variants are likely to be of ENU origin.

171

## 172 **Mutation burden analysis identifies potential candidate thrombosis suppressor** 173 **genes**

174 WES data for 107 independent rescue mice were jointly analyzed to identify  
175 candidate genes that are enriched for potentially deleterious ENU-induced variants  
176 including missense, nonsense, frameshift, and splice site altering mutations (3,481 out  
177 of 6,771 variants in 2,984 genes, S4 Table). Similar mutation burden analyses have  
178 been used to identify genes underlying rare diseases caused by *de novo* loss-of-  
179 function variants in humans [19-22]. In our study, the majority of genes harbored only a  
180 single ENU-induced variant, with 15 SNVs identified in *Ttn*, the largest gene in the  
181 mouse genome (Fig 1E). After adjusting for coding region size and multiple testing (for



182 2,984 genes), the ENU-induced mutation burden of potentially deleterious variants was  
183 significantly greater than expected by chance for 3 genes (FDR<0.1, *Arl6ip5*, *Itgb6*, *C6*)  
184 and suggestive for 9 additional genes (FDR<0.25). Sanger sequencing validated 36 of  
185 the 37 variants in these 12 candidate genes (S4 Table). While in this study, stringent  
186 correction for multiple testing suggested no significant enrichment (*Arl6ip5* FDR=0.68,  
187 Fig 2), the potential power of this burden analysis is highly dependent on the number of  
188 possible genes that could result in a viable rescue. If there were 30 such genes in the  
189 genome and every one of the 107 rescue mice carried a mutation in one of these 30  
190 genes, each gene would be, on average, represented by ~3.5 mutations (107/30), with  
191 >7 genes expected to carry 5 or more mutations, which should have been sufficient to  
192 distinguish from the background mutation rate. However, if 500 genes could rescue the  
193 phenotype, sequencing close to a thousand mice would be required to achieve sufficient  
194 mapping power. The power could be further compromised by modifier genes with  
195 incomplete penetrance, imperfect predictions for potentially harmful mutations, and by  
196 the previously reported background survival rate for the rescue mice [6]. Due to the  
197 uncertainty of the power of these analyses, we proceeded to experimentally test the  
198 thrombosuppressive effects of loss of function mutations in the genes identified by  
199 mutation burden analysis.

200

## 201 **Independent alleles for 6 candidate genes fail to replicate thrombosis** 202 **suppression**

203 Independent null alleles were generated with CRISPR/Cas9 for the top candidate  
204 genes (*Arl6ip5*, *C6*, *Itgb6*, *Cpn1*, *Sntg1* and *Ces3b*; Fig 2) to test for

205 thrombosuppression. From 294 microinjected zygotes with pooled guide RNAs targeting  
206 these 6 genes, we obtained 39 progeny. CRISPR/Cas9 genome editing was assessed  
207 by Sanger sequencing of the sgRNA target sites. Approximately 190 independent  
208 targeting events were observed across the 6 genes in 36 of the 39 mice including small  
209 INDELS, single nucleotide changes, and several large (>30bp) deletions or inversions.  
210 Targeted alleles were either homozygous, heterozygous, or mosaic, with the number of  
211 editing events varying greatly for different sgRNAs (2.5-85%). Two or more different  
212 CRISPR/Cas9-induced alleles for each of the candidate genes (S5 Table) were bred to  
213 isolation but maintained on the  $F5^L$  background for subsequent test crossing. The  
214 progeny of  $F5^{L/L} Tfp1^{+/+}$  mice crossed with  $F5^{L/+} Tfp1^{+/-}$  mice (one of these parental mice  
215 also carrying the CRISPR/Cas9-induced allele) were monitored for survival of  $F5^{L/L}$   
216  $Tfp1^{+/-}$  offspring (Table 1, S6 Table).

217

218 **Table 1. Testing for rescue effect with CRISPR/Cas9-induced alleles**

| Gene           | Total mice tested | No. of rescues w/o allele | No. of rescues with allele | P-value* |
|----------------|-------------------|---------------------------|----------------------------|----------|
| <i>Arl6ip5</i> | 205               | 1                         | 5                          | 0.21     |
| <i>Itgb6</i>   | 154               | 1                         | 1                          | 1        |
| <i>C6</i>      | 106               | 0                         | 0                          | 1        |
| <i>Cpn1</i>    | 139               | 0                         | 1                          | 1        |
| <i>Sntg1</i>   | 223               | 3                         | 4                          | 1        |
| <i>Ces3b</i>   | 219               | 2                         | 1                          | 1        |

219 \*Fisher's exact test

220

221 Over 100 progeny were generated for each of the candidate genes with no  
222 obvious rescue effect. A slight increase in rescues carrying  $F5^{L/L} Tfp1^{+/-} Arl6ip5^{+/-}$   
223 genotype was noted, although it remained non-significant after surveying 205 offspring

224 (p=0.21, Table 1). Nonetheless, rescue of the  $F5^{L/L} Tfp1^{+/-}$  phenotype by *Arl6ip5*  
225 haploinsufficiency cannot be excluded, particularly at reduced penetrance. Of note,  
226 rescue of  $F5^{L/L} Tfp1^{+/-}$  lethality by haploinsufficiency for *F3* (the target of TFPI) only  
227 exhibits penetrance of ~33% [5], a level of rescue which current observations cannot  
228 exclude for *Arl6ip5* and *Sntg1*. For most of the other candidate genes, the number of  
229 observed  $F5^{L/L} Tfp1^{+/-}$  mice did not differ from the expected background survival rate for  
230 this genotype (~2%) [6]. Though higher numbers of rescues were observed for offspring  
231 from the *Sntg1* cross, these were equally distributed between mice with and without the  
232 *Sntg1* loss-of-function allele.

233

234 **A *Plcb4* mutation co-segregates with the rescue phenotype in 3 G1 siblings and**  
235 **their rescue offspring**

236 The number of G1 rescues produced from each ENU-treated G0 male is shown  
237 in Fig 3A. Though most of the 182 G0 males yielded few or no G1 rescue offspring, a  
238 single G0 produced 6 rescues out of a total of 39 offspring (Fig 3A), including the  
239 founder G1 rescue for the largest pedigree (number 13). This observation suggested a  
240 potential shared rescue variant rather than 6 independent rescue mutations from the  
241 same G0 founder. Similarly, another previously reported ENU screen identified 7  
242 independent ENU pedigrees with an identical phenotype mapping to the same genetic  
243 locus, also hypothesized to result from a single shared mutation [7]. While rescue  
244 siblings could theoretically originate from the same mutagenized spermatogonial stem  
245 cell and share ~50% of their induced mutations [23], such a common stem cell origin

246 was excluded by exome sequence analysis in the rescue G1 sibs identified here (see  
247 Materials and methods).

248 Analysis of WES for 3 of the G1 rescues originating from this common G0  
249 founder male (Fig 3B, S2 Table) identified 3 protein-altering variants (*Plcb4*<sup>R335Q</sup>,  
250 *Pyhin1*<sup>G157T</sup>, and *Figl2*<sup>G82S</sup>) shared among 2 or more of the 6 G1 rescues (S7 Table).  
251 *Plcb4*<sup>R335Q</sup> was detected as a *de novo* mutation in one of the non-mutagenized G0  
252 females in phase with the *Tfpi* null allele (Fig 3B) and was present in 3 out of 6 G1  
253 rescue siblings. *Plcb4* is located approximately 50 megabases upstream of the *Tfpi*  
254 locus on chromosome 2 (predicted recombination between *Plcb4* and *Tfpi* ~14.1%) (Fig  
255 3C) [24, 25]. While non-rescue littermates exhibited the expected rate of recombination  
256 between the *Plcb4*<sup>R335Q</sup> and *Tfpi* loci (20.2%), all 43 rescue mice (3 G1s and their 40  
257 ≥G2 progeny) were non-recombinant and carried the *Plcb4*<sup>R335Q</sup> variant. This co-  
258 segregation between the *Plcb4*<sup>R335Q</sup> variant and the rescue phenotype is statistically  
259 significant (p=0.003; Fig 3C). *Plcb4*<sup>R335Q</sup> lies within a highly conserved region of *Plcb4*  
260 (Fig 3D) and is predicted to be deleterious by Polyphen-2 [26]. The other identified non-  
261 ENU variants (*Pyhin1*<sup>G157T</sup> and *Figl2*<sup>G82S</sup>) did not segregate with the rescue phenotype  
262 (S6 Fig).

263 Although the estimated *de novo* mutation rate for inbred mice (~5.4 x 10<sup>-9</sup>  
264 bp/generation) is 200X lower than our ENU mutation rate, other *de novo* variants have  
265 coincidentally been identified in ENU screens [27]. Mutations identified by DNA  
266 sequencing of offspring from ENU screens will not distinguish between an ENU-induced  
267 and *de novo* origin, though the former is generally assumed, given its much higher  
268 prevalence in the setting of a mutagenesis screen. *De novo* mutations originating in the

269 G0 paternal or maternal lineages will be identified by analysis of parental genotypes, as  
270 was the case for the *Plcb4*<sup>R355Q</sup> variant. However, this variant was originally removed  
271 from the candidate list by a filtering step based on the assumption that each ENU-  
272 induced mutation should be unique to a single G1 offspring. This filtering algorithm was  
273 very efficient for removing false positive variants in our screen and others [16].  
274 However, our findings illustrate the risk for potential false negative results that this  
275 approach confers.

276

### 277 **Independent mutant allele for *Plcb4* recapitulates the rescue phenotype**

278 An independent *Plcb4* null allele was generated by CRISPR/Cas9. Three distinct  
279 INDELS were identified by Sanger sequencing in the 25 progeny obtained from the  
280 CRISPR/Cas9-injected oocytes. One of these alleles introduced a single nucleotide  
281 insertion at amino acid 328, resulting in a frameshift in the protein coding sequence  
282 (*Plcb4*<sup>ins1</sup>, Fig 4A-B). A total of 169 progeny from a *F5*<sup>L/L</sup> *Plcb4*<sup>+/ins1</sup> X *F5*<sup>L/+</sup> *Tfpi*<sup>+/-</sup> cross  
283 yielded 11 *F5*<sup>L/L</sup> *Tfpi*<sup>+/-</sup> rescue progeny surviving to weaning (Fig 4C, S8 Table). Ten of  
284 these 11 rescues carried the *Plcb4*<sup>ins1</sup> allele, consistent with significant rescue (p=0.01,  
285 Fig 4C) with reduced penetrance (~40%). *Plcb4* encodes phospholipase C, beta 4 and  
286 has been recently associated with auriculocondylar syndrome in humans [28]. No role  
287 for PLCB4 in the regulation of hemostasis has been previously reported, and the  
288 underlying mechanism for suppression of the lethal *F5*<sup>L/L</sup> *Tfpi*<sup>+/-</sup> phenotype is unknown.

289 The above rescue of the *F5*<sup>L/L</sup> *Tfpi*<sup>+/-</sup> phenotype by an independent *Plcb4* mutant  
290 allele, strongly supports the identification of the *de novo* *Plcb4*<sup>R355Q</sup> mutation as the  
291 causal suppressor variant for Pedigree 13. These findings are also most consistent with

292 a loss-of-function mechanism of action for the *Plcb4*<sup>R355Q</sup> mutation. The lack of a  
293 positive signal from this genomic region by the linkage analysis described above (S5  
294 Fig) is likely explained by the absence of a nearby genetically informative ENU variant  
295 (the closest, *Abca2* is located >50 Mb downstream from both *Tfpi* and *Plcb4* (S3 Table,  
296 S5 Fig)). Of note, 4 of the 107 rescue mice in the WES mutation burden analysis also  
297 carried a *Plcb4* mutation consistent with its suppressor function, though below the level  
298 of statistical significance. Nonetheless, these findings highlight the feasibility of our  
299 approach, given sufficient power.

300

301 In conclusion, we performed a dominant, sensitized ENU mutagenesis screen for  
302 modifiers of thrombosis. Analysis of extended pedigrees identified *Plcb4* as a novel  
303 thrombosis modifier. Though mutation burden analysis suggested several other  
304 potential modifier loci, including *Arl6ip5*, incomplete penetrance and the background  
305 phenocopy rate significantly limited the power to detect additional thrombosis  
306 suppressor genes. Future applications of this approach will likely require significantly  
307 larger sample sizes and/or a more stringent sensitized genotype for screening.  
308 Nonetheless, our findings demonstrate the power of a sensitized ENU screen and  
309 mutation burden analysis to identify novel loci contributing to the regulation of  
310 hemostatic balance and candidate modifier genes for thrombosis and bleeding risk in  
311 humans.

312

## 313 **Materials and methods**

### 314 **Mice**

315 Mice carrying the murine homolog of the FVL mutation [29] ( $F5^L$ ; also available  
316 from Jackson Laboratories stock #004080) or the TFPI Kunitz domain deletion ( $Tfpi$ )  
317 [30] were genotyped using PCR assays with primers and conditions as previously  
318 described [29, 30], and maintained on the C57BL/6J background (Jackson Laboratories  
319 stock #000664). All animal care and procedures were performed in accordance with the  
320 Principles of Laboratory and Animal Care established by the National Society for  
321 Medical Research. The Institutional Animal Care and Use Committee at the University  
322 of Michigan has approved protocols PRO00005191 and PRO00007879 used for the  
323 current study and conforms to the standards of “The Guide for the Care and Use of  
324 Laboratory Animals” (Revised 2011).

325

#### 326 **ENU screen**

327 ENU mutagenesis was performed as previously described [5], with all mice on  
328 the C57BL/6J genetic background. Briefly, 189  $F5^{L/L}$  male mice (6-8 weeks old) were  
329 administered three weekly intraperitoneal injections of 90 mg/kg of ENU (N-ethyl-N-  
330 nitrosourea, Sigma-Aldrich). Eight weeks later, 182 surviving males were mated to  $F5^{L/+}$   
331  $Tfpi^{+/-}$  females and their G1 progeny were genotyped at age 2-3 weeks to identify viable  
332  $F5^{L/L} Tfpi^{+/-}$  offspring (‘rescues’).  $F5^{L/L} Tfpi^{+/-}$  G1 rescues were crossed to  $F5^{L/L}$  mice on  
333 the C57BL/6J genetic background (backcrossed >20 generations) and transmission was  
334 considered positive with the presence of one or more rescue progeny. Theoretical  
335 mapping power in rescue pedigrees was estimated by 10,000 simulations using  
336 SIMLINK software [31].

337

## 338 **Whole exome sequencing**

339           Gender, age, WES details, and other characteristics for 108 rescue mice are  
340 provided in S2 Table. Genomic DNA (gDNA) extracted from tail biopsies of 56 G1  
341 offspring from the current ENU screen and from an additional 50 *F5<sup>L/L</sup> Tfp1<sup>+/-</sup>* mice on the  
342 C57BL/6J background from the previous screen [5] were subjected to WES at the  
343 Northwest Genomics Center, University of Washington. Sequencing libraries were  
344 prepared using the Roche NimbleGen exome capture system. DNA from an additional  
345 two rescue offspring was subjected to WES at Beijing Genomics Institute or Centrillion  
346 Genomics Technologies, respectively (S2 Table). These two libraries were prepared  
347 using the Agilent SureSelect capture system. 100 bp paired-end sequencing was  
348 performed for all 108 exome libraries using Illumina HiSeq 2000 or 4000 sequencing  
349 instruments. Two WES mice represented rescue pedigree 1: the G1 founder and a G2  
350 rescue offspring. The latter was used for linkage analysis, but excluded from the burden  
351 analysis (S2 Table).

352

## 353 **WES data analysis**

354           Average sequencing coverage, estimated by QualiMap software [32], was 77X,  
355 and >96% of the captured area was covered by at least 6 independent reads (S2  
356 Table). All generated fastq files have been deposited to the NCBI Sequence Read  
357 Archive (Project accession number #PRJNA397141). A detailed description of variant  
358 calling as well as in-house developed scripts for variant filtration are online as a GitHub  
359 repository ([github.com/tombergk/FVL\\_mod](https://github.com/tombergk/FVL_mod)). In short, Burrows-Wheeler Aligner [33] was  
360 used to align reads to the *Mus Musculus* GRCm38 reference genome, Picard [34] to



361 remove duplicates, and GATK [35] to call and filter the variants. Annovar software [36]  
362 was applied to annotate the variants using the Refseq database. All variants within our  
363 mouse cohort present in more than one rescue were declared non-ENU induced and  
364 therefore removed. Unique heterozygous variants with a minimum of 6X coverage were  
365 considered as potential ENU mutations. Among 107 whole exome sequenced G1 mice,  
366 38 were siblings (13 sib-pairs and 4 trios, S2 Table). 190 heterozygous variants present  
367 in 2 or 3 mice (representing sibpairs or trios) out of 107 rescues were examined, with 15  
368 found to be shared by siblings (S7 Table). Of the 7 sibs/trios sharing an otherwise novel  
369 variant, none shared >10% of their identified variants – inconsistent with the expected  
370 50% for progeny originating from the same ENU-treated spermatogonial stem cell.

371

## 372 **Mutation frequency estimations**

373 All ENU-induced variants predicted to be potentially harmful within protein coding  
374 sequences including missense, nonsense, splice site altering SNVs, and out-of-frame  
375 insertions-deletions (INDELs), were summed for every gene. The number of potentially  
376 damaging variants per gene was compared to a probability distribution of each gene  
377 being targeted by chance. Probability distributions were obtained by running 10 million  
378 random permutations using probabilities adjusted to the length of the protein coding  
379 region. A detailed pipeline for the permutation analysis is available online  
380 ([github.com/tombergk/FVL\\_mod](https://github.com/tombergk/FVL_mod)). Genes that harbored more potentially damaging  
381 ENU-induced variants than expected by chance were considered as candidate modifier  
382 genes. FDR statistical correction for multiple testing was applied as previously  
383 described [37].

384

### 385 **Variant validation by Sanger sequencing**

386 All coding variants in pedigrees 1, 6, and 13 as well as all variants in candidate  
387 modifier genes from the burden analysis were assessed using Sanger sequencing.  
388 Variants were considered ENU-induced if identified in the G1 rescue but not its parents.  
389 All primers were designed using Primer3 software [38] and purchased from Integrated  
390 DNA Technologies. PCR was performed using GoTaq Green PCR Master Mix  
391 (Promega), visualized on 2% agarose gel, and purified using QIAquick Gel Extraction  
392 Kit (Qiagen). Sanger sequencing of purified PCR products was performed by the  
393 University of Michigan Sequencing Core. Outer primers were used to generate the PCR  
394 product which was then sequenced using the internal sequencing primers. All outer  
395 PCR primers (named: gene name+'\_OF/OR') and internal sequencing primers (named:  
396 gene name+'\_IF/IR') are listed in S9 Table.

397

### 398 **Guide RNA design and *in vitro* transcription**

399 Guide RNA target sequences were designed with computational tools [39, 40]  
400 (<http://www.broadinstitute.org/rnai/public/analysis-tools/sgrna-design> or [http://genome-](http://genome-engineering.org)  
401 [engineering.org](http://genome-engineering.org)) and top predictions per each candidate gene were selected for  
402 functional testing (S10 Table). Single guide RNAs (sgRNA) for *C6*, *Ces3b*, *Itgb6*, and  
403 *Sntg1* were *in vitro* synthesized (MAXIscript T7 Kit, Thermo Fisher) from double  
404 stranded DNA templates by GeneArt gene synthesis service (Thermo Fisher) while the  
405 4 sgRNAs for *Arl6ip5* were *in vitro* synthesized using the Guide-it sgRNA In Vitro  
406 Transcription Kit (Clontech). The sgRNAs were purified prior to activity testing

407 (MEGAclear Transcription Clean-Up Kit, Thermo Fisher). Both the Wash and Elution  
408 Solutions of the MEGAclear Kit were pre-filtered with 0.02  $\mu\text{m}$  size exclusion membrane  
409 filters (Anotop syringe filters, Whatman) to remove particulates from zygote  
410 microinjection solutions, thus preventing microinjection needle blockages.

411

#### 412 ***in vitro* Cas9 DNA cleavage assay**

413 Target DNA for the *in vitro* cleavage assays was PCR amplified from genomic  
414 DNA isolated from JM8.A3 C57BL/6N mouse embryonic stem (ES) cells [41] with  
415 candidate gene specific primers (S10 Table). *In vitro* digestion of target DNA was  
416 carried out by complexes of synthetic sgRNA and *S. pyogenes* Cas9 Nuclease (New  
417 England BioLabs) according to manufacturer's recommendations. Agarose gel  
418 electrophoresis of the reaction products was used to identify sgRNA molecules that  
419 mediated template cleavage by Cas9 protein (S7 Fig). *Arl6ip5* was assayed separately,  
420 with one out-of-four tested sgRNAs successfully cleaving the PCR template.

421

#### 422 **Cell culture DNA cleavage assay**

423 Synthetic sgRNAs that targeted *Cpn1* were not identified by the *in vitro* Cas9  
424 DNA cleavage assay. As an alternative assay, sgRNA target sequences (*Cpn1*-g1,  
425 *Cpn1*-g2) were cloned into plasmid pX330-U6-Chimeric\_BB-CBh-hSpCas9  
426 (Addgene.org Plasmid #42230) [42] and co-electroporated into JM8.A3 ES cells as  
427 previously described [43]. Briefly, 15  $\mu\text{g}$  of a Cas9 plasmid and 5  $\mu\text{g}$  of a PGK1-puro  
428 expression plasmid [44] were co-electroporated into  $0.8 \times 10^7$  ES cells. On days two and  
429 three after electroporation media containing 2  $\mu\text{g}/\text{ml}$  puromycin was applied to the cells;

430 then selection free media was applied for four days. Genomic DNA was purified from  
431 surviving ES cells. The *Cpn1* region targeted by the sgRNA was PCR amplified and  
432 tested for the presence of indel formation with a T7 endonuclease I assay according to  
433 the manufacturer's instructions (New England Biolabs).

434

### 435 **Generation of CRISPR/Cas9 gene edited mice**

436 CRISPR/Cas9 gene edited mice were generated in collaboration with the  
437 University of Michigan Transgenic Animal Model Core. A premixed solution containing  
438 2.5 ng/μl of each sgRNA for *Arl6ip5*, *C6*, *Ces3b*, *Itgb6*, *Sntg1*, and 5 ng/μl of Cas9  
439 mRNA (GeneArt CRISPR Nuclease mRNA, Thermo Fisher) was prepared in RNase  
440 free microinjection buffer (10 mM Tris-Hcl, pH 7.4, 0.25 mM EDTA). The mixture also  
441 included 2.5 ng/μl of pX330-U6-Chimeric\_BB-CBh-hSpCas9 plasmid containing guide  
442 *Cpn1-g1* and a 2.5 ng/μl of pX330-U6-Chimeric\_BB-CBh-hSpCas9 plasmid containing  
443 guide *Cpn1-g2* targeting *Cpn1* (S10 Table). The mixture of sgRNAs, Cas9 mRNA, and  
444 plasmids was microinjected into the male pronucleus of fertilized mouse eggs obtained  
445 from the mating of stud males carrying the *F5<sup>L/+</sup> Tfp1<sup>+/-</sup>* genotype on the C57BL/6J  
446 background with superovulated C57BL/6J female mice. Microinjected eggs were  
447 transferred to pseudopregnant B6DF1 female mice (Jackson Laboratories stock  
448 #100006). DNA extracted from tail biopsies of offspring was genotyped for the presence  
449 of gene editing. The *Plcb4* allele was targeted in a separate experiment in collaboration  
450 with the University of Michigan Transgenic Animal Model Core using a pX330-U6-  
451 Chimeric\_BB-CBh-hSpCas9 plasmid that contained guide *Plcb4* (5 ng/μl).

452

## 453 **CRISPR allele genotyping**

454           Initially, sgRNA targeted loci were tested using PCR and Sanger sequencing  
455 (primer sequences provided in S10 Table). Small INDELs were deconvoluted from  
456 Sanger sequencing reads using TIDE software [45]. A selection of null alleles from >190  
457 editing events were maintained for validation (S5 Table). Large (>30 bp) deletions were  
458 genotyped using PCR reactions that resulted in two visibly distinct PCR product sizes  
459 for the deletion and wildtype alleles. Expected product sizes and genotyping primers for  
460 each deletion are listed in S5 Table. All genotyping strategies were initially validated  
461 using Sanger sequencing.

462

## 463 **Picogreen DNA quantification and qPCR**

464           A qPCR approach was applied to exclude large on-target CRISPR/Cas9-induced  
465 deletions. All DNA samples were quantified using the Quant-iT™ PicoGreen® dsDNA  
466 Assay Kit (Life Technologies) and analyzed on the Molecular Devices SpectraMax® M3  
467 multi-mode microplate reader using SoftMax® Pro software and diluted to 5ng/μl.  
468 Primer pairs were designed for each gene using Primer Express 3.0 software (S9  
469 Table) and samples were measured in triplicate using Power SYBR® Green PCR  
470 Master Mix (Thermo Fisher Scientific) on a 7900 HT Fast Real-Time PCR System  
471 (Applied Biosystems) with DNA from wildtype C57BL/6J mice used as a reference.  
472 While large CRISPR/Cas9 induced deletions extending the borders of the PCR primers  
473 have been reported [46], qPCR did not detect evidence for a large deletion in any of the  
474 CRISPR targeted genes.

475

## 476 **Statistical analysis**

477           Kaplan-Meier survival curves and a log-rank test to estimate significant  
478 differences in mouse survival were performed using the ‘survival’ package in R [47]. A  
479 paired two-tailed Student’s t-test was applied to estimate differences in weights between  
480 rescue mice and their littermates. Fisher’s exact tests were applied to estimate  
481 deviations from expected proportions in mouse crosses. Mendelian segregation for  
482 CRISPR/Cas9-induced alleles among non-rescue littermates was assessed in a subset  
483 of mice by Sanger sequencing and then assumed for the rest of the littermates in the  
484 Fisher’s exact tests. Benjamini and Hochberg FDR for ENU burden analysis, Student’s  
485 t-tests, and Fisher’s exact tests were all performed using the ‘stats’ package in R  
486 software [48]. Linkage analysis was performed on the Mendel platform version 14.0 [49]  
487 and LOD scores  $\geq 3.3$  were considered genome-wide significant [50].

488

## 489 **Acknowledgments**

490           We acknowledge Wanda Filipiak, Galina Gavrilina, Elizabeth Hughes, and  
491 Michael Zeidler for assistance in the preparation of CRISPR/Cas9 reagents and gene  
492 edited transgenic mice in the Transgenic Animal Model Core of the University of  
493 Michigan’s Biomedical Research Core Facilities. We thank the University of Michigan  
494 DNA Sequencing Core and the Northwest Genomics Center at the University of  
495 Washington, Department of Genome Sciences for sequencing services.

496

## 497 **Figure captions**

498 **Fig 1. Distribution of ENU-induced mutations in WES data from 107 G1 rescues**

499 A) Overview of mutation types for the 6,771 observed ENU-induced exonic variants. B)  
500 Distribution of missense mutations by nucleotide substitution type. C) Distribution of  
501 ENU-variants by chromosome. D) The average number of exonic SNVs is ~65 for both  
502 the current (G1-new) and previous (G1-old) screen [5]. E) Number of genes (x-axis)  
503 sorted by the number of protein-altering ENU-induced mutations observed per gene (y-  
504 axis). Most genes (2,567) carry only 1 mutation. In contrast, the ~0.1 megabase coding  
505 region of *Ttn* carries a total of 15 independent ENU variants.

506

507 **Fig 2. Mutation enrichment per gene in WES data from 107 G1 rescues**

508 All genes with potentially deleterious ENU mutations are sorted by their chromosomal  
509 position on the x-axis, with the y-axis indicating the statistical significance (negative log  
510 of the p-value) of each gene's enrichment based on  $10^6$  permutations normalized to  
511 coding region size. Each dot represents a gene and the diameter is proportional to the  
512 number of mutations observed. Gray dotted lines represent FDR values of 0.1 and 0.25  
513 (normalized to 2,984 genes carrying mutations). Red dotted line represents FDR value  
514 0.8 from a more stringent test (normalized to all 20,586 genes in the simulation).

515

516 **Fig 3. *Plcb4*<sup>R335Q</sup> co-segregates with the rescue phenotype in pedigrees 12 and 13**

517 A) One ENU mating exhibited a significantly higher number of rescue progeny (n=6)  
518 compared to all ENU matings ( $p < 5 \times 10^{-5}$ ) and compared to ENU matings with  $\geq 1$  rescue  
519 progeny ( $p < 0.05$ ). B) One female in this ENU mating carried a *de novo* SNV (R335Q) in  
520 the *Plcb4* gene that was inherited in phase with the *Tfpi* allele that was inherited by 3 of  
521 the G1 rescues. C) The *Plcb4* gene is loosely linked to the *Tfpi* locus on chromosome 2,

522 with a predicted recombination rate of 14.1%. No recombination was observed in 40  
523 rescues from pedigree 12 and 13, while their littermates (n=149) exhibited close to the  
524 expected recombination rate. D) The *Plcb4*<sup>R335Q</sup> mutation lies in a highly conserved  
525 region in exon 13 (data from Multiz alignment on UCSC Genome Browser).

526

527 **Fig 4. An independent CRISPR/Cas9 induced *Plcb4* allele validates the rescue**  
528 **phenotype**

529 A) The CRISPR/Cas9-induced *Plcb4*<sup>ins1</sup> allele (insertion of the nucleotide 'A' at amino  
530 acid 328) results in a frameshift to the protein coding sequence leading to a premature  
531 stop codon. B) Sanger sequencing analysis of a wildtype mouse and a heterozygous  
532 mouse for the *Plcb4*<sup>ins1</sup> allele C) 169 progeny genotyped from a validation cross of *F5*<sup>L/L</sup>  
533 *Plcb4*<sup>+/ins1</sup> mice with *F5*<sup>L/+</sup> *Tfpi*<sup>+/-</sup>.

534

535 **Supporting information**

536 **S1 Fig. A sensitized ENU suppressor screen for thrombosis modifiers**

537 A) The ENU screen strategy is depicted here, along with the total numbers of G1  
538 offspring observed by genotype. B) Survival curves for G1 rescue mice. Approximately  
539 50% of the rescue mice died by 6 weeks of age, with no significant survival difference  
540 observed between females and males (p=0.077), though females were  
541 underrepresented compared to males during the initial genotyping (28 females  
542 compared to 48 males, p=0.022). C-D) Weight at genotyping (at 14-21 days) was on  
543 average 25-30% smaller for G1 rescues than their littermates (p=7x10<sup>-13</sup>). E) Survival of  
544 rescue mice beyond G1 (≥G2) is also reduced, with worse outcome in females



545 (p=0.002). Across all pedigrees, mice beyond G1 ( $\geq$ G2) continued to exhibit reduced  
546 survival with more pronounced underrepresentation of females (p=0.002), and F) an  
547 average ~22% lower body weight compared to littermates (mean defined as 100%) at  
548 the time of genotyping (p=2x10<sup>-16</sup>).

#### 549 **S2 Fig. Size distribution of ENU pedigrees**

550 The ENU rescue pedigrees from the previous screen (n=16, [5]) are significantly  
551 larger than the ENU rescue pedigrees observed in the current screen (p=0.010, n=15,  
552 S1 Table).

#### 553 **S3 Fig. Genetic mapping of ENU-induced variants in pedigree 1**

554 A) Overview of pedigree 1 (only rescue mice displayed). B) All coding ENU-induced  
555 mutations identified by WES were genotyped in all rescues from the pedigree by Sanger  
556 sequencing. Blue boxes indicate presence and red boxes indicate absence of the  
557 mutation. P1-P3 refers to 3 parental genotypes (G0 male and 2 untreated females). C)  
558 Linkage analysis using the ENU-induced variants from (B) as genetic markers.

#### 559 **S4 Fig. Genetic mapping of ENU-induced variants in pedigree 6**

560 A) Overview of pedigree 6 (only rescue mice displayed). B) All coding ENU-induced  
561 mutations identified by WES were genotyped in most rescues from the pedigree by  
562 Sanger sequencing. Blue boxes indicate presence and red boxes indicate absence of  
563 the mutation. P1-P3 refers to 3 parental genotypes (G0 male and 2 untreated females).  
564 C) Linkage analysis using the ENU-induced variants from (B) as genetic markers.

#### 565 **S5 Fig. Genetic mapping of ENU variants in pedigree 13**

566 A) Overview of pedigree 13 (only rescue mice displayed). B) All coding ENU-induced  
567 mutations identified by WES were genotyped in all rescues from the pedigree if present

568 in key mice 3 and 5 by Sanger sequencing. Blue boxes indicate presence and red  
569 boxes indicate absence of the mutation. P1-P3 refers to 3 parental genotypes (G0 male  
570 and 2 untreated females). C) Linkage analysis using the ENU-induced variants from (B)  
571 as genetic markers.

572 **S6 Fig. Segregation analysis for *Pyhin1* and *Figl2* in pedigree 13**

573 Segregation analysis in pedigree 13 for A) *Pyhin1* and B) *Figl2* variants. Blue boxes  
574 indicate presence and red boxes indicate absence of the mutation. White boxes indicate  
575 untested mice, while light red boxes indicate untested mice with assumed absence of  
576 the mutation.

577 **S7 Fig. *In vitro* cleavage assay for sgRNAs**

578 A) sgRNA+Cas9 targeting created double strand breaks in DNA templates obtained  
579 from genomic DNA by PCR. Expected sizes after sgRNA+Cas9 endonuclease activity:  
580 430bp/240bp (*Ces3b*), 334bp/273bp (*Sntg1*), 530bp/275bp (*Itgb6*), and 383bp/296bp  
581 (*C6*). B) sgRNA+Cas9 complexes targeting *Cpn1* using two different guides (g1, g2)  
582 failed to generate detectable double strand breaks. Positive control (P.C.) was added to  
583 ensure Cas9 protein activity, with expected sizes after cleavage (390bp/140bp)  
584 indicated by white stars.

585 **S1 Table. Overview of successfully progeny tested rescues**

586 **S2 Table. Rescue mice subjected to WES**

587 **S3 Table. Variants identified for pedigrees 1, 6, and 13**

588 **S4 Table. ENU-induced coding variants in WES data**

589 **S5 Table. CRISPR/Cas9 induced alleles**

590 **S6 Table. Validation crosses with CRISPR/Cas9 induced alleles**

591 **S7 Table. Shared variants between 2-3 mice in WES data**

592 **S8 Table. *Plcb4*<sup>ins1</sup> validation cross**

593 **S9 Table. Primer sequences**

594 **S9 Table. Sequences and genotyping data for gRNAs**

595

## 596 **References**

597 1. Souto JC, Almasy L, Borrell M, Blanco-Vaca F, Mateo J, Soria JM, et al. Genetic  
598 susceptibility to thrombosis and its relationship to physiological risk factors: the GAIT  
599 study. *Genetic Analysis of Idiopathic Thrombophilia. AmJHumGen.* 2000;67(6):1452-9.

600 2. Heit JA, Phelps MA, Ward SA, Slusser JP, Petterson TM, De Andrade M. Familial  
601 segregation of venous thromboembolism. *J Thromb Haemost.* 2004;2(5):731-6. Epub  
602 2004/04/22. doi: 10.1111/j.1538-7933.2004.00660.x  
603 JTH660 [pii]. PubMed PMID: 15099278.

604 3. Germain M, Chasman DI, de Haan H, Tang W, Lindstrom S, Weng LC, et al. Meta-  
605 analysis of 65,734 individuals identifies TSPAN15 and SLC44A2 as two susceptibility loci  
606 for venous thromboembolism. *Am J Hum Genet.* 2015;96(4):532-42. doi:  
607 10.1016/j.ajhg.2015.01.019. PubMed PMID: 25772935; PubMed Central PMCID:  
608 PMC4385184.

609 4. Roldan V, Lecumberri R, Munoz-Torrero JF, Vicente V, Rocha E, Brenner B, et al.  
610 Thrombophilia testing in patients with venous thromboembolism. Findings from the RIETE  
611 registry. *Thromb Res.* 2009;124(2):174-7. Epub 2008/12/23. doi:  
612 10.1016/j.thromres.2008.11.003  
613 S0049-3848(08)00550-1 [pii]. PubMed PMID: 19101711.

- 614 5. Westrick RJ, Tomberg K, Siebert AE, Zhu G, Winn ME, Dobies SL, et al. Sensitized  
615 mutagenesis screen in Factor V Leiden mice identifies thrombosis suppressor loci. Proc  
616 Natl Acad Sci U S A. 2017;114(36):9659-64. doi: 10.1073/pnas.1705762114. PubMed  
617 PMID: 28827327; PubMed Central PMCID: PMC5594664.
- 618 6. Eitzman DT, Westrick RJ, Bi X, Manning SL, Wilkinson JE, Broze GJ, Jr., et al. Lethal  
619 Perinatal thrombosis in mice resulting from the interaction of tissue factor pathway  
620 inhibitor deficiency and factor V Leiden. Circulation. 2002;105:2139-42.
- 621 7. Wansleeben C, van Gurp L, Feitsma H, Kroon C, Rieter E, Verberne M, et al. An ENU-  
622 mutagenesis screen in the mouse: identification of novel developmental gene functions.  
623 PLoS One. 2011;6(4):e19357. doi: 10.1371/journal.pone.0019357. PubMed PMID:  
624 21559415; PubMed Central PMCID: PMC3084836.
- 625 8. Montagutelli X. Effect of the genetic background on the phenotype of mouse  
626 mutations. J Am Soc Nephrol. 2000;11 Suppl 16:S101-5. Epub 2000/11/07. PubMed PMID:  
627 11065339.
- 628 9. Papathanasiou P, Tunningley R, Pattabiraman DR, Ye P, Gonda TJ, Whittle B, et al. A  
629 recessive screen for genes regulating hematopoietic stem cells. Blood. 2010;116(26):5849-  
630 58. doi: 10.1182/blood-2010-04-269951. PubMed PMID: 20610815.
- 631 10. Bull KR, Rimmer AJ, Siggs OM, Miosge LA, Roots CM, Enders A, et al. Unlocking the  
632 bottleneck in forward genetics using whole-genome sequencing and identity by descent to  
633 isolate causative mutations. PLoS Genet. 2013;9(1):e1003219. Epub 2013/02/06. doi:  
634 10.1371/journal.pgen.1003219  
635 PGENETICS-D-12-02054 [pii]. PubMed PMID: 23382690; PubMed Central PMCID:  
636 PMC3561070.

- 637 11. Gallego-Llamas J, Timms AE, Geister KA, Lindsay A, Beier DR. Variant mapping and  
638 mutation discovery in inbred mice using next-generation sequencing. *BMC Genomics*.  
639 2015;16:913. doi: 10.1186/s12864-015-2173-1. PubMed PMID: 26552429; PubMed  
640 Central PMCID: PMCPMC4640199.
- 641 12. White TA, Pan S, Witt TA, Simari RD. Murine strain differences in hemostasis and  
642 thrombosis and tissue factor pathway inhibitor. *Thromb Res*. 2010;125(1):84-9. doi:  
643 10.1016/j.thromres.2009.03.006. PubMed PMID: 19398123; PubMed Central PMCID:  
644 PMCPMC2826594.
- 645 13. Tomberg K, Khoriaty R, Westrick RJ, Fairfield HE, Reinholdt LG, Brodsky GL, et al.  
646 Spontaneous 8bp Deletion in Nbeal2 Recapitulates the Gray Platelet Syndrome in Mice.  
647 *PLoS One*. 2016;11(3):e0150852. doi: 10.1371/journal.pone.0150852. PubMed PMID:  
648 26950939; PubMed Central PMCID: PMCPMC4780761.
- 649 14. Li Y, Klena NT, Gabriel GC, Liu X, Kim AJ, Lemke K, et al. Global genetic analysis in  
650 mice unveils central role for cilia in congenital heart disease. *Nature*. 2015;521(7553):520-  
651 4. doi: 10.1038/nature14269. PubMed PMID: 25807483; PubMed Central PMCID:  
652 PMCPMC4617540.
- 653 15. Fairfield H, Gilbert GJ, Barter M, Corrigan RR, Curtain M, Ding Y, et al. Mutation  
654 discovery in mice by whole exome sequencing. *Genome Biol*. 2011;12(9):R86. Epub  
655 2011/09/16. doi: 10.1186/gb-2011-12-9-r86  
656 gb-2011-12-9-r86 [pii]. PubMed PMID: 21917142; PubMed Central PMCID: PMC3308049.
- 657 16. Andrews TD, Whittle B, Field MA, Balakishnan B, Zhang Y, Shao Y, et al. Massively  
658 parallel sequencing of the mouse exome to accurately identify rare, induced mutations: an

- 659 immediate source for thousands of new mouse models. *Open Biol.* 2012;2(5):120061. Epub  
660 2012/06/23. doi: 10.1098/rsob.120061  
661 rsob120061 [pii]. PubMed PMID: 22724066; PubMed Central PMCID: PMC3376740.
- 662 17. Justice MJ, Noveroske JK, Weber JS, Zheng B, Bradley A. Mouse ENU mutagenesis.  
663 *Human Molecular Genetics.* 1999;8(10):1955-63.
- 664 18. Arnold CN, Barnes MJ, Berger M, Blasius AL, Brandl K, Croker B, et al. ENU-induced  
665 phenovariance in mice: inferences from 587 mutations. *BMC Res Notes.* 2012;5:577. Epub  
666 2012/10/26. doi: 10.1186/1756-0500-5-577  
667 1756-0500-5-577 [pii]. PubMed PMID: 23095377; PubMed Central PMCID: PMC3532239.
- 668 19. Gibson WT, Hood RL, Zhan SH, Bulman DE, Fejes AP, Moore R, et al. Mutations in  
669 EZH2 cause Weaver syndrome. *Am J Hum Genet.* 2012;90(1):110-8. Epub 2011/12/20. doi:  
670 10.1016/j.ajhg.2011.11.018  
671 S0002-9297(11)00496-4 [pii]. PubMed PMID: 22177091; PubMed Central PMCID:  
672 PMC3257956.
- 673 20. Hoischen A, van Bon BW, Gilissen C, Arts P, van Lier B, Stehouwer M, et al. De novo  
674 mutations of SETBP1 cause Schinzel-Giedion syndrome. *Nat Genet.* 2010;42(6):483-5. Epub  
675 2010/05/04. doi: 10.1038/ng.581  
676 ng.581 [pii]. PubMed PMID: 20436468.
- 677 21. Riviere JB, van Bon BW, Hoischen A, Kholmanskikh SS, O'Roak BJ, Gilissen C, et al. De  
678 novo mutations in the actin genes ACTB and ACTG1 cause Baraitser-Winter syndrome. *Nat*  
679 *Genet.* 2012;44(4):440-4, S1-2. Epub 2012/03/01. doi: 10.1038/ng.1091  
680 ng.1091 [pii]. PubMed PMID: 22366783; PubMed Central PMCID: PMC3677859.

- 681 22. Tsurusaki Y, Okamoto N, Ohashi H, Kosho T, Imai Y, Hibi-Ko Y, et al. Mutations  
682 affecting components of the SWI/SNF complex cause Coffin-Siris syndrome. *Nat Genet.*  
683 2012;44(4):376-8. Epub 2012/03/20. doi: 10.1038/ng.2219  
684 ng.2219 [pii]. PubMed PMID: 22426308.
- 685 23. Russell WL, Kelly EM, Hunsicker PR, Bangham JW, Maddux SC, Phipps EL. Specific-  
686 locus test shows ethylnitrosourea to be the most potent mutagen in the mouse. *Proc Natl*  
687 *Acad Sci U S A.* 1979;76(11):5818-9. Epub 1979/11/01. PubMed PMID: 293686; PubMed  
688 Central PMCID: PMC411742.
- 689 24. Sang F, Jiang P, Wang W, Lu Z. ReDB: A meiotic homologous recombination rate  
690 database. *Chinese Science Bulletin.* 2010;55(27-28):3169-73. doi: 10.1007/s11434-010-  
691 3029-3.
- 692 25. Jensen-Seaman MI, Furey TS, Payseur BA, Lu Y, Roskin KM, Chen CF, et al.  
693 Comparative recombination rates in the rat, mouse, and human genomes. *Genome Res.*  
694 2004;14(4):528-38. doi: 10.1101/gr.1970304. PubMed PMID: 15059993; PubMed Central  
695 PMCID: PMCPMC383296.
- 696 26. Adzhubei IA, Schmidt S, Peshkin L, Ramensky VE, Gerasimova A, Bork P, et al. A  
697 method and server for predicting damaging missense mutations. *Nat Methods.*  
698 2010;7(4):248-9. doi: 10.1038/nmeth0410-248. PubMed PMID: 20354512; PubMed  
699 Central PMCID: PMCPMC2855889.
- 700 27. Bannister LA, Pezza RJ, Donaldson JR, de Rooij DG, Schimenti KJ, Camerini-Otero RD,  
701 et al. A dominant, recombination-defective allele of Dmc1 causing male-specific sterility.  
702 *PLoS Biol.* 2007;5(5):e105. doi: 10.1371/journal.pbio.0050105. PubMed PMID: 17425408;  
703 PubMed Central PMCID: PMC1847842.

- 704 28. Rieder MJ, Green GE, Park SS, Stamper BD, Gordon CT, Johnson JM, et al. A human  
705 homeotic transformation resulting from mutations in *PLCB4* and *GNAI3* causes  
706 auriculocondylar syndrome. *Am J Hum Genet.* 2012;90(5):907-14. doi:  
707 10.1016/j.ajhg.2012.04.002. PubMed PMID: 22560091; PubMed Central PMCID:  
708 PMC3376493.
- 709 29. Cui J, Eitzman DT, Westrick RJ, Christie PD, Xu ZJ, Yang AY, et al. Spontaneous  
710 thrombosis in mice carrying the factor V Leiden mutation. *Blood.* 2000;96(13):4222-6.
- 711 30. Huang ZF, Higuchi D, Lasky N, Broze GJ, Jr. Tissue factor pathway inhibitor gene  
712 disruption produces intrauterine lethality in mice. *Blood.* 1997;90:944-51.
- 713 31. Boehnke M, Ploughman L. SIMLINK: A Program for Estimating the Power of a  
714 Proposed Linkage Study by Computer Simulations. Version 4.12, April 2, 1997.
- 715 32. Garcia-Alcalde F, Okonechnikov K, Carbonell J, Cruz LM, Gotz S, Tarazona S, et al.  
716 Qualimap: evaluating next-generation sequencing alignment data. *Bioinformatics.*  
717 2012;28(20):2678-9. doi: 10.1093/bioinformatics/bts503. PubMed PMID: 22914218.
- 718 33. Li H, Durbin R. Fast and accurate short read alignment with Burrows-Wheeler  
719 transform. *Bioinformatics.* 2009;25(14):1754-60. Epub 2009/05/20. doi:  
720 10.1093/bioinformatics/btp324  
721 btp324 [pii]. PubMed PMID: 19451168; PubMed Central PMCID: PMC2705234.
- 722 34. Picard tools. Available from: <http://picard.sourceforge.net>.
- 723 35. DePristo MA, Banks E, Poplin R, Garimella KV, Maguire JR, Hartl C, et al. A  
724 framework for variation discovery and genotyping using next-generation DNA sequencing  
725 data. *Nat Genet.* 2011;43(5):491-8. Epub 2011/04/12. doi: 10.1038/ng.806  
726 ng.806 [pii]. PubMed PMID: 21478889; PubMed Central PMCID: PMC3083463.



- 727 36. Wang K, Li M, Hakonarson H. ANNOVAR: functional annotation of genetic variants  
728 from high-throughput sequencing data. *Nucleic Acids Res.* 2010;38(16):e164. Epub  
729 2010/07/06. doi: 10.1093/nar/gkq603  
730 [gkq603 \[pii\]](#). PubMed PMID: 20601685; PubMed Central PMCID: PMC2938201.
- 731 37. Benjamini Y, Hochberg Y. Controlling the False Discovery Rate - a Practical and  
732 Powerful Approach to Multiple Testing. *J Roy Stat Soc B Met.* 1995;57(1):289-300. PubMed  
733 PMID: WOS:A1995QE45300017.
- 734 38. Untergasser A, Cutcutache I, Koressaar T, Ye J, Faircloth BC, Remm M, et al. Primer3-  
735 -new capabilities and interfaces. *Nucleic Acids Res.* 2012;40(15):e115. doi:  
736 10.1093/nar/gks596. PubMed PMID: 22730293; PubMed Central PMCID:  
737 PMCPMC3424584.
- 738 39. Doench JG, Hartenian E, Graham DB, Tothova Z, Hegde M, Smith I, et al. Rational  
739 design of highly active sgRNAs for CRISPR-Cas9-mediated gene inactivation. *Nat*  
740 *Biotechnol.* 2014;32(12):1262-7. doi: 10.1038/nbt.3026. PubMed PMID: 25184501;  
741 PubMed Central PMCID: PMCPMC4262738.
- 742 40. Hsu PD, Scott DA, Weinstein JA, Ran FA, Konermann S, Agarwala V, et al. DNA  
743 targeting specificity of RNA-guided Cas9 nucleases. *Nat Biotechnol.* 2013;31(9):827-32.  
744 doi: 10.1038/nbt.2647. PubMed PMID: 23873081; PubMed Central PMCID:  
745 PMCPMC3969858.
- 746 41. Pettitt SJ, Liang Q, Rairdan XY, Moran JL, Prosser HM, Beier DR, et al. Agouti  
747 C57BL/6N embryonic stem cells for mouse genetic resources. *Nat Methods.* 2009;6(7):493-  
748 5. doi: 10.1038/nmeth.1342. PubMed PMID: 19525957; PubMed Central PMCID:  
749 PMCPMC3555078.

- 750 42. Cong L, Ran FA, Cox D, Lin S, Barretto R, Habib N, et al. Multiplex genome  
751 engineering using CRISPR/Cas systems. *Science*. 2013;339(6121):819-23. doi:  
752 10.1126/science.1231143. PubMed PMID: 23287718; PubMed Central PMCID:  
753 PMC3795411.
- 754 43. Pease S, Saunders TL, International Society for Transgenic Technologies. Advanced  
755 protocols for animal transgenesis an ISTT manual. Heidelberg ; New York ;: Springer; 2011.  
756 Available from:  
757 [http://proxy.lib.umich.edu/login?url=http://link.springer.com/openurl?genre=book&isbn](http://proxy.lib.umich.edu/login?url=http://link.springer.com/openurl?genre=book&isbn=978-3-642-20791-4)  
758 [=978-3-642-20791-4](http://proxy.lib.umich.edu/login?url=http://link.springer.com/openurl?genre=book&isbn=978-3-642-20791-4).
- 759 44. McBurney MW, Fournier S, Jardine K, Sutherland L. Intragenic regions of the murine  
760 P<sub>gk</sub>-1 locus enhance integration of transfected DNAs into genomes of embryonal carcinoma  
761 cells. *Somat Cell Mol Genet*. 1994;20(6):515-28. PubMed PMID: 7892649.
- 762 45. Brinkman EK, Chen T, Amendola M, van Steensel B. Easy quantitative assessment of  
763 genome editing by sequence trace decomposition. *Nucleic Acids Res*. 2014;42(22):e168.  
764 doi: 10.1093/nar/gku936. PubMed PMID: 25300484; PubMed Central PMCID:  
765 PMC4267669.
- 766 46. Shin HY, Wang C, Lee HK, Yoo KH, Zeng X, Kuhns T, et al. CRISPR/Cas9 targeting  
767 events cause complex deletions and insertions at 17 sites in the mouse genome. *Nat*  
768 *Commun*. 2017;8:15464. doi: 10.1038/ncomms15464. PubMed PMID: 28561021; PubMed  
769 Central PMCID: PMC5460021.
- 770 47. Therneau TM, Grambsch PM. Modeling survival data : extending the Cox model. New  
771 York: Springer; 2000. xiii, 350 p. p.

- 772 48. R: A Language and Environment for Statistical Computing Vienna, Austria R Core  
773 Team. Available from: <http://www.R-project.org/>.
- 774 49. Lange K, Papp JC, Sinsheimer JS, Sripracha R, Zhou H, Sobel EM. Mendel: the Swiss  
775 army knife of genetic analysis programs. *Bioinformatics*. 2013;29(12):1568-70. doi:  
776 10.1093/bioinformatics/btt187. PubMed PMID: 23610370; PubMed Central PMCID:  
777 PMC3673222.
- 778 50. Lander E, Kruglyak L. Genetic dissection of complex traits: guidelines for  
779 interpreting and reporting linkage results. *Nat Genet*. 1995;11(3):241-7. Epub  
780 1995/11/01. doi: 10.1038/ng1195-241. PubMed PMID: 7581446.
- 781

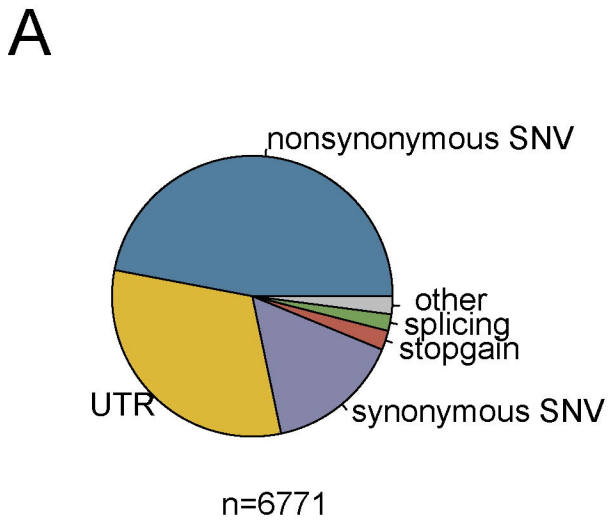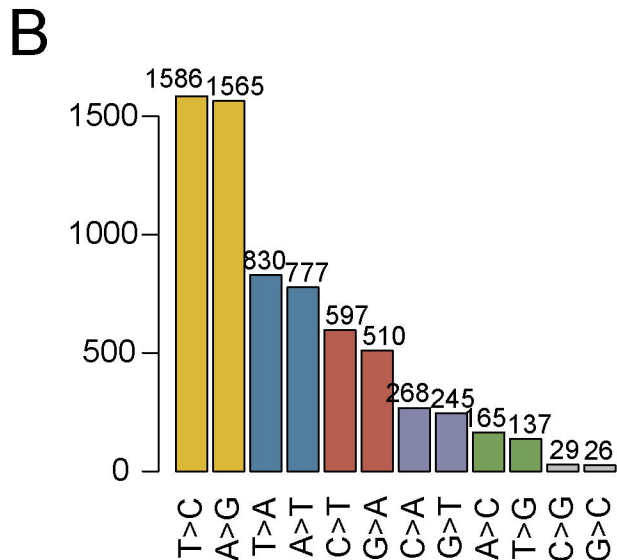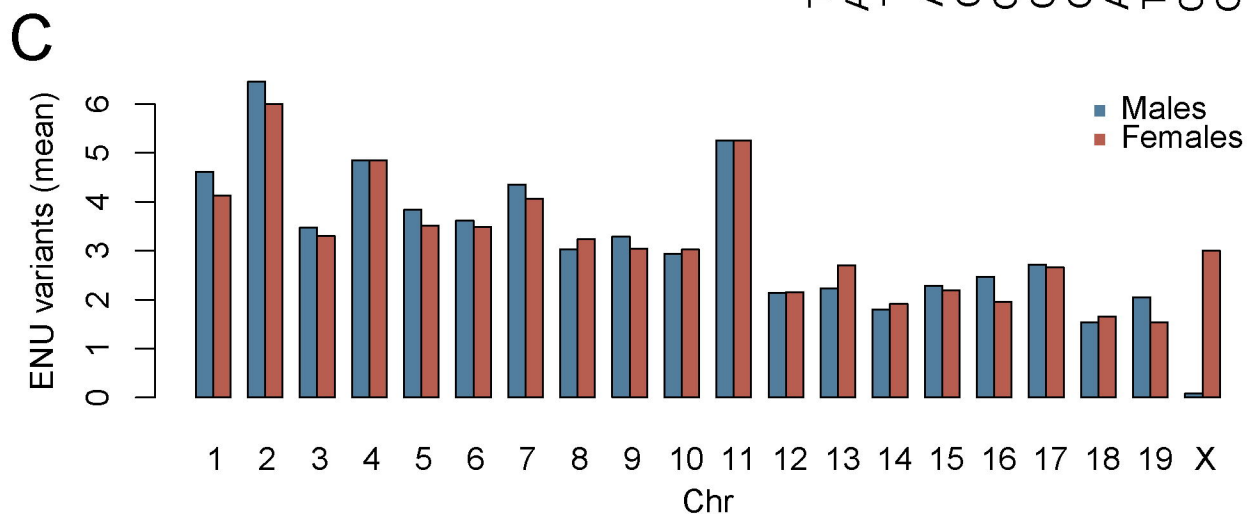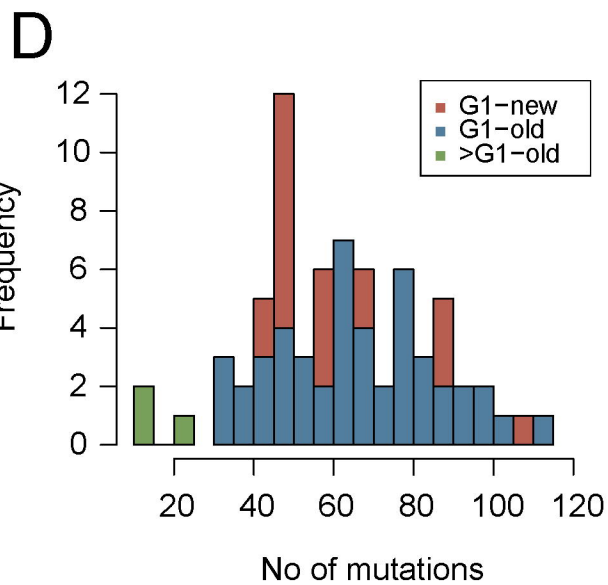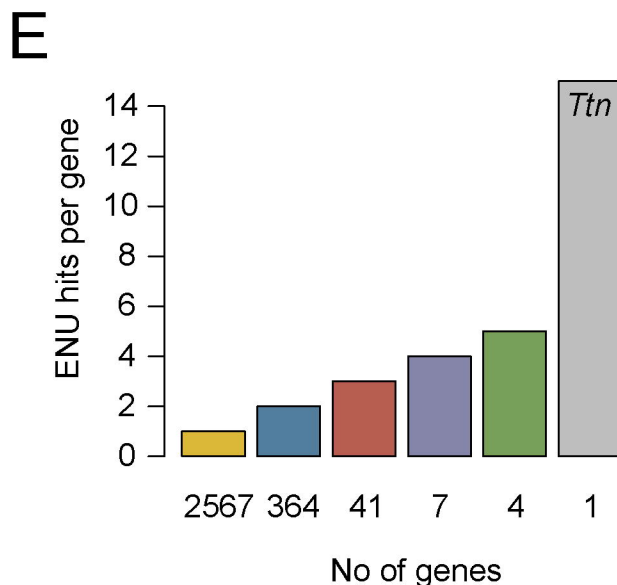

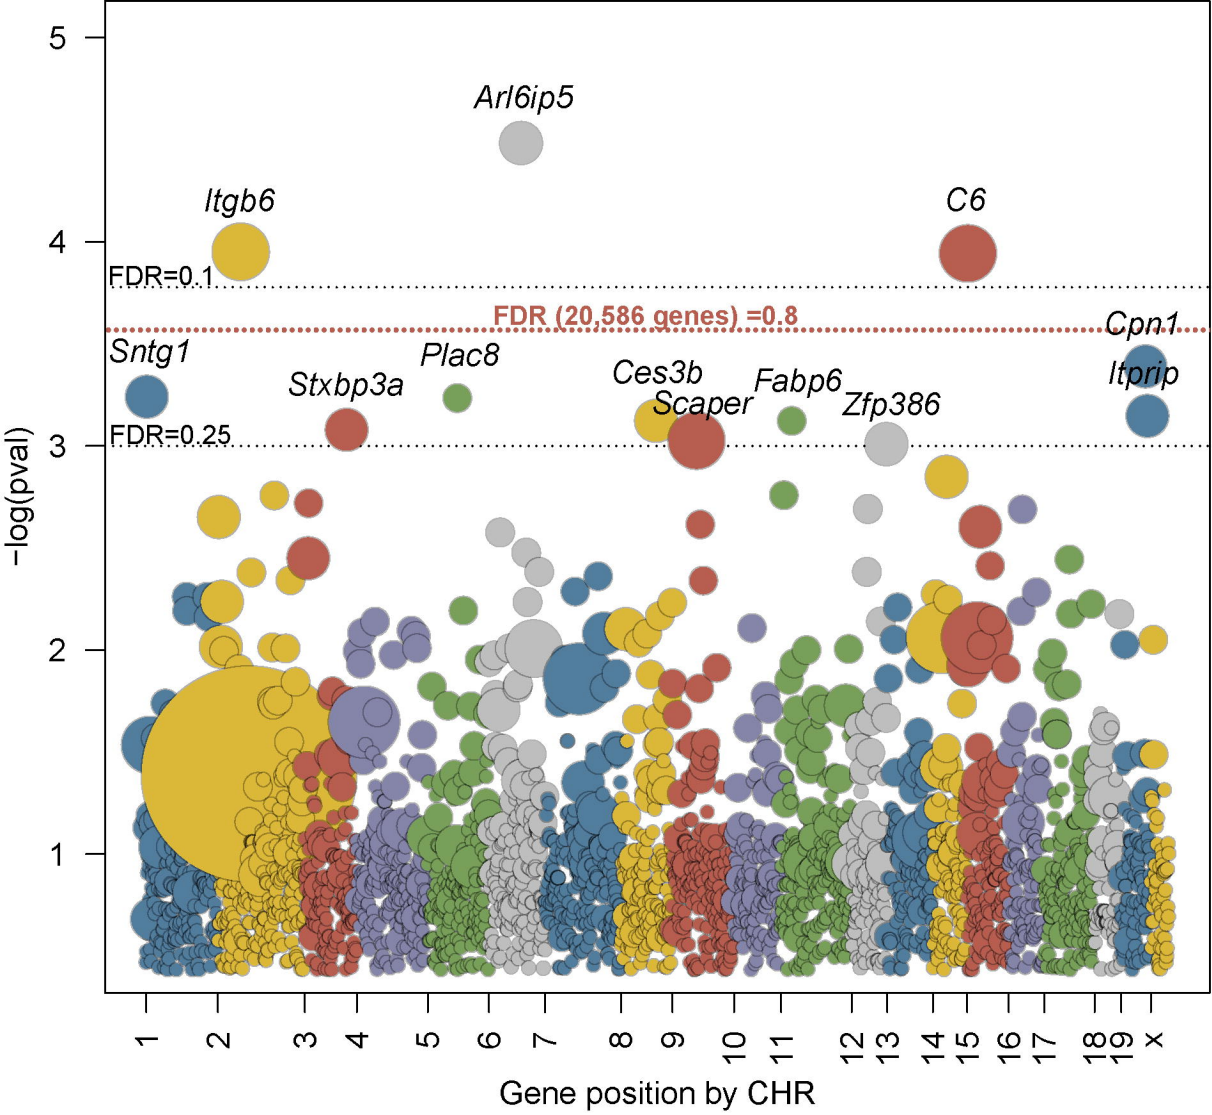

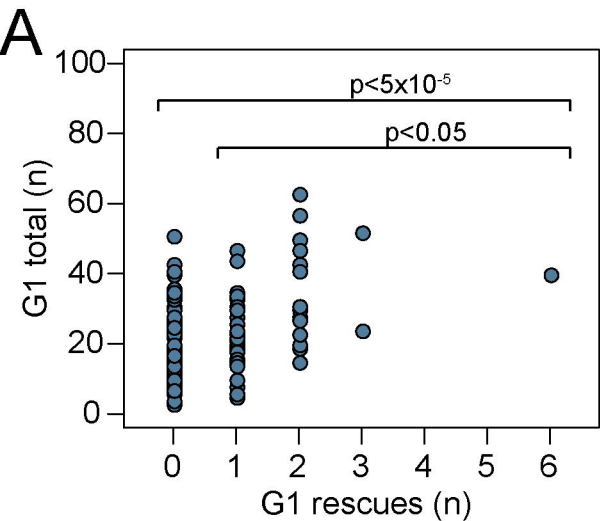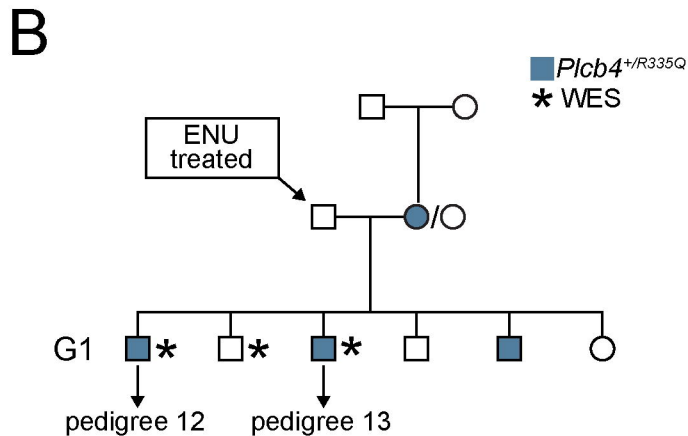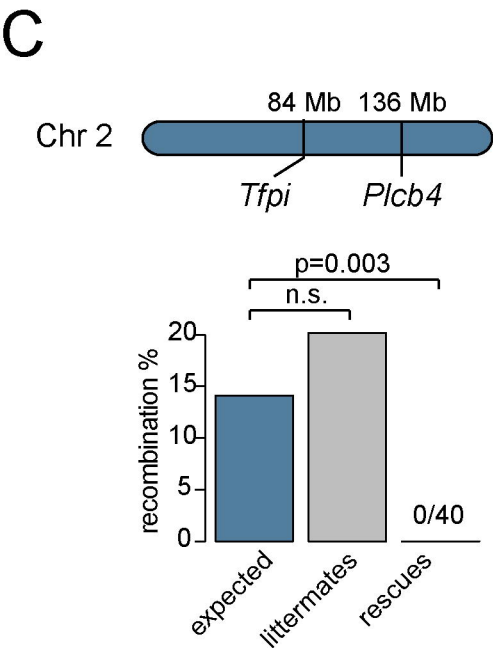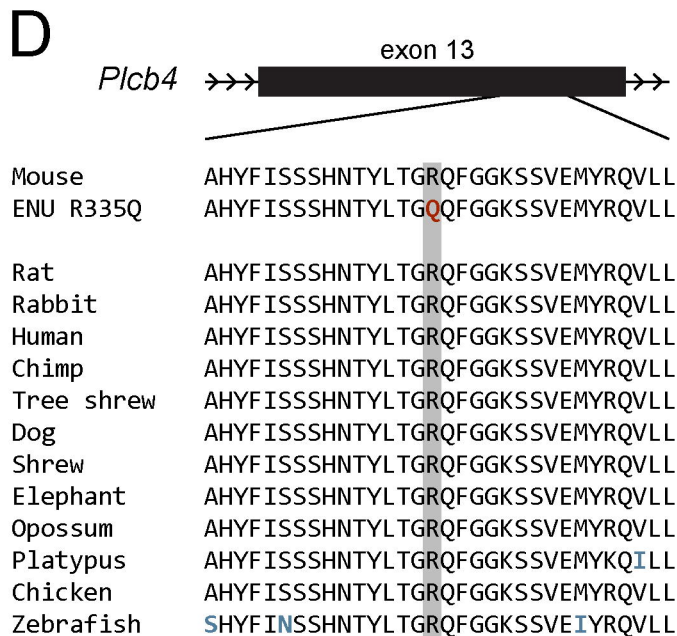

**A**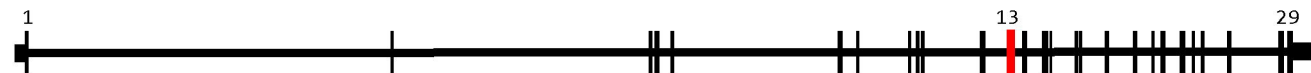

326 S S H N T Y L T G R Q F G G K S S V E M Y R Q V L L A G C R C V E L D 360  
 ref tcctccacaacacctatctcactggccggcaatttggaggaaagtcttcagtggaatgtacagacaagttctcctggctggttgac...gtgtgttgaacttgac  
 ins tcctcccaAcaacacctatctcactggccggcaatttggaggaaagtcttcagtggaatgtacagacaagttctcctggctggttgac..gtgtgttga  
 326 S S Q Q H L S H W P A I W R K V F S G N V Q T S S P G W L Q V C X

**B**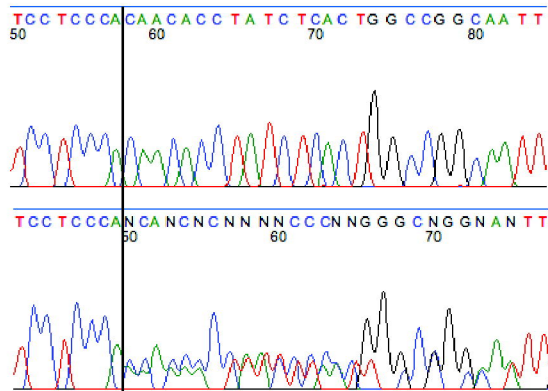**C**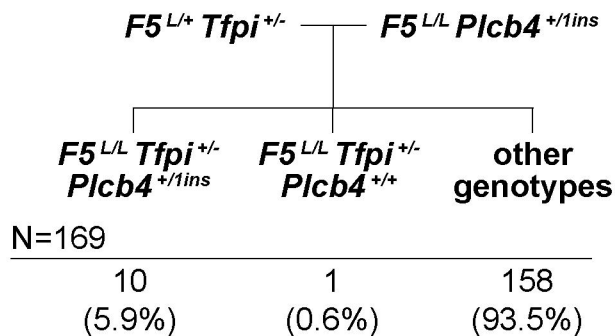

Source: https://www.biorxiv.org/content/10.1101/174086v2.full.pdf
